# Supplementary material
Source: PubMed Central journal article supplement (PMC3121933)
Supplement: supp_data.pdf [file supp_data.pdf]

## Supplementary Data

SUPPLEMENTARY TABLE S1. ANTIBODIES USED IN THIS STUDY

| <i>Specificity label</i>              | <i>Clone</i> | <i>Product no.</i> | <i>Isotype</i> | <i>Source</i>           |
|---------------------------------------|--------------|--------------------|----------------|-------------------------|
| Albumin-FITC                          | Polyclonal   | 0220-0204          |                | Biogenesis Inc.         |
| CD1-FITC                              | HI149        | 34224x             | IgG1           | BD Biosciences          |
| CD1a-PE                               | BL6          | IM1942U            | IgG1           | Beckman Coulter         |
| CD2-FITC                              | S5.2         | 347593             | IgG2a          | BD Biosciences          |
| CD2-PE                                | T11-RD1      | T11-RD1            | IgG1           | Beckman Coulter         |
| CD3-PE                                | SK7          | 347347             | IgG1           | BD Biosciences          |
| CD4-PE                                | IV T114      | 550630             | IgG1           | BD Biosciences          |
| CD5-PE                                | L17F12       | 347307             | IgG2a          | BD Biosciences          |
| CD7-PE                                | 6B7          | MHCD0704           | IgG2a          | Invitrogen              |
| CD9-PE                                | M-L13        | 555372             | IgG1           | BD Biosciences          |
| CD13-PE                               | L138         | 347837             | IgG1           | BD Biosciences          |
| CD14-PE                               | TÜK4         | MHCD1404           | IgG2a          | Invitrogen              |
| CD14                                  | HCD14        | 325601             | IgG1           | BioLegend               |
| CD15-PE                               | V1MC6        | MHCD1504           | IgM            | Invitrogen              |
| CD19-PE                               | SJ25-C1      | MHCD1904           | IgG1           | Invitrogen              |
| CD20-PE                               | HI47         | MHCD2004           | IgG3           | Invitrogen              |
| CD24-PE                               | ML5          | 311105             | IgG2a          | BioLegend               |
| CD26-PE                               | BA5b         | CD2604             | IgG2a          | Invitrogen              |
| CD29-PE                               | MAR4         | 555443             | IgG1           | BD Biosciences          |
| CD31-PE                               | MBC78.2      | MHCD3104           | IgG1           | Invitrogen              |
| CD34-PE                               | 581          | CD34-581           | IgG1           | Invitrogen              |
| CD38-PE                               | HB7          | 347687             | IgG1           | BD Biosciences          |
| CD44-PE                               | MEM85        | MHCD4404           | IgG1           | Invitrogen              |
| CD45-FITC                             | HI30         | MHCD4501           | IgG1           | Invitrogen              |
| CD45-PE                               | HI30         | MHCD4504           | IgG1           | Invitrogen              |
| CD49f-PE                              | GoH3         | 555735             | IgG2a          | BD Biosciences          |
| CD59-PE                               | MEM-43       | MHCD5904           | IgG2a          | Invitrogen              |
| CD56-PE                               | C5.9         | 0564               | IgG2b          | Exalpa Biologicals Inc. |
| CD71-PE                               | L01.1        | 555537             | IgG2a          | BD Biosciences          |
| CD90-PE                               | 5E10         | 555596             | IgG1           | BD Biosciences          |
| CD105-PE                              | SN6          | MHCD10504          | IgG1           | Invitrogen              |
| CD117-PE                              | 104D2        | 340867             | IgG1           | BD Biosciences          |
| CD220-PE                              | 3B6/IR       | 559955             | IgG1           | BD Biosciences          |
| CD227-FITC                            | 3H2740       | M4700-05D          | IgG3           | USBiological            |
| CD235a                                | 10F7MN       | HB-8162            | IgG1           | ATCC                    |
| CD243-PE                              | UIC2         | 2370               | IgG2a          | Beckmann Coulter        |
| CD271-PE                              | C40-1457     | 557196             | IgG1           | BD Biosciences          |
| CD324-PE                              | 67A4         | 324106             | IgG1           | Biolegend               |
| CD326-APC                             | HEA-125      | 130091254          | IgG1           | Miltenyi Biotech        |
| CD326-Alexa Fluor 488                 | 9C4          | 324209             | IgG2b          | BioLegend               |
| CK7/CK8-FITC                          | CAM-5.2      | 347653             | IgG2a          | BD Biosciences          |
| CK7-FITC                              | 2Q1023       | C9097-40D1         | IgG2b          | US Biological           |
| CK8-FITC                              | 2Q1026       | C9097-42B1         | IgG1           | US Biological           |
| CK19                                  | RCK108       | M0888              | IgG1           | DAKO                    |
| SMA-FITC                              | IA4          | F-3777             | IgG2a          | Sigma Chemical Co.      |
| Mouse IgG1-FITC                       | Polyclonal   | MG101              | IgG1           | Invitrogen              |
| Mouse IgG2a-FITC                      | Polyclonal   | MG2a01             | IgG2a          | Invitrogen              |
| Mouse IgG1-PE                         | Polyclonal   | MG104              | IgG1           | Invitrogen              |
| Mouse IgG2a-PE                        | Polyclonal   | MG2a04             | IgG2a          | Invitrogen              |
| Mouse IgG2b-PE                        | Polyclonal   | MG2b04             | IgG2b          | Invitrogen              |
| Mouse IgM-PE                          | Polyclonal   | MGM04              | IgM            | Invitrogen              |
| Mouse IgG1-APC                        | Polyclonal   | MG105              | IgG1           | Invitrogen              |
| Goat anti-mouse IgG1 Alexa Fluor 568  | Polyclonal   | A-21124            |                | Invitrogen              |
| Goat anti-mouse IgG2a Alexa Fluor 568 | Polyclonal   | A-21134            |                | Invitrogen              |
| Goat anti-mouse IgG2b Alexa Fluor 568 | Polyclonal   | A-21144            |                | Invitrogen              |

FITC, fluorescein isothiocyanate; PE, phycoerythrin; APC, allophycocyanin; ATCC, American Type Culture Collection.

SUPPLEMENTARY TABLE S2. QUANTITATIVE POLYMERASE CHAIN REACTION PRIMER SEQUENCES

| Gene              | Primers                       | Position  | GenBank accession no. | Product size (bp) | References |
|-------------------|-------------------------------|-----------|-----------------------|-------------------|------------|
| 18S rRNA (F)      | 5'- TTCGGAAGTGGAGCCATGAT      | 1842–1861 | gi22760900            | 151               | [1]        |
| 18S rRNA (R)      | 5'- CGAACCTCCGACTTTCGTTT      | 1992–1973 |                       |                   |            |
| AAT (F)           | 5'- CAGAGGAGGCACCCCTGAA       | 1266–1284 | gi28193183            | 71                | [2]        |
| AAT (R)           | 5'- AGTCCCTTCTCGTCGATGGT      | 1336–1316 |                       |                   |            |
| AFP (F)           | 5'- GCAAAGCTGAAAATGCAGTTGA    | 622–643   | gi311348              | 129               | [2]        |
| AFP (R)           | 5'- GGAAAGTTCGGGTCCCAAAA      | 750–731   |                       |                   |            |
| ALB (F)           | 5'- TGCTTGAATGTGCTGATGACAGGG  | 861–884   | gi51476389            | 161               | [3]        |
| ALB (R)           | 5'- AAGGCAAGTCAGCAGGCATCTCATC | 1022–998  |                       |                   |            |
| CD14 (F)          | 5'- AGAGGTTTCGGAAGACTTATCG    | 331–351   | gi91105163            | 143               | [4]        |
| CD14 (R)          | 5'- TCGGAGAAGTTGCAGACGC       | 473–455   |                       |                   |            |
| CD31 (F)          | 5'- CCTGATGCCGTGGAAAGC        | 2374–2391 | gi110347450           | 85                | [4]        |
| CD31 (R)          | 5'- TCCAGGGATGTGCATCTGG       | 2458–2440 |                       |                   |            |
| CD45 (F)          | 5'- AACAGTGGAGAAAGGACGCA      | 27–46     | gi34280               | 111               | [5]        |
| CD45 (R)          | 5'- TGTGTCCAGAAAGGCAAAGC      | 137–118   |                       |                   |            |
| CD117 (F)         | 5'- GATGACGAGTTGGCCCTAGA      | 2296–2315 | gi34084               | 233               | [6]        |
| CD117 (R)         | 5'- CAGGTAGTCGAGCGTTTCCT      | 2520–2499 |                       |                   |            |
| CD326 (F)         | 5'- CTGGCCGTAAACTGCTTTGT      | 278–297   | gi4505058             | 182               | [7]        |
| CD326 (R)         | 5'- AGCCCATCAATTGTTCTGGAG     | 459–440   |                       |                   |            |
| CK7 (F)           | 5'- CAATGAGACGGAGTTGACAG      | 811–830   | gi67782364            | 189               |            |
| CK7 (R)           | 5'- TGGAGGGTCTCAAACCTGGT      | 999–980   |                       |                   |            |
| CK19 (F)          | 5'- CCGCGACTACAGCCACTACT      | 404–423   | gi34038               | 152               | [7]        |
| CK19 (R)          | 5'- GAGCCTGTTCCGTCTCAAAC      | 555–536   |                       |                   |            |
| c-Met (F)         | 5'- CTGCCTGCAATCTACAAGGT      | 1871–1890 | gi42741654            | 66                | [8]        |
| c-Met (R)         | 5'- ATGGTCAGCCTTGTCCTC        | 1936–1917 |                       |                   |            |
| Cyp3A7 (F)        | 5'- CCTTACCCCAATTCTTGAAGCA    | 789–810   | gi13386504            | 198               | [9]        |
| Cyp3A7 (R)        | 5'- TCCAGATCAGACAGAGCTTTGTG   | 986–964   |                       |                   |            |
| HNF3 $\alpha$ (F) | 5'- CATTGCCATCGTGTGCTTGT      | 2789–2808 | gi24497500            | 78                |            |
| HNF3 $\alpha$ (R) | 5'- CCCGTCTGGCTATACTAACACCAT  | 2866–2843 |                       |                   |            |
| Prox1 (F)         | 5'- ACATTCAGATGGAGAAGTACG     | 2165–2188 | gi34147628            | 268               | [10]       |
| Prox1 (R)         | 5'- CTTCACTATCCA GCTTGCAGA    | 2433–2414 |                       |                   |            |
| TF (F)            | 5'- CTACACAGGCGCTTTCAGGT      | 1655–1674 | gi21536430            | 152               | [11]       |
| TF (R)            | 5'- TACCATCAAGGCACAGCAAC      | 1806–1787 |                       |                   |            |

F, forward; R, reverse.

### Supplementary References

- Lie-A-Ling M, CT Bakker, T Deurholt, et al. (2006). Selection of tumour specific promoters for adenoviral gene therapy of cholangiocarcinoma. *J Hepatol* 44:126–133.
- Nava S, M Westgren, M Jaksch, et al. (2005). Characterization of cells in the developing human liver. *Differentiation* 73:249–260.
- Schwartz RE, M Reyes, L Koodie, et al. (2002). Multipotent adult progenitor cells from bone marrow differentiate into functional hepatocyte-like cells. *J Clin Invest* 109:1291–1302.
- Timmermans F, F Van Hauwermeiren, M De Smedt, et al. (2007). Endothelial outgrowth cells are not derived from CD133+ cells or CD45+ hematopoietic precursors. *Arterioscler Thromb Vasc Biol* 27:1572–1579.
- Hussain SZ, SC Strom, MR Kirby, et al. (2005). Side population cells derived from adult human liver generate hepatocyte-like cells *in vitro*. *Dig Dis Sci* 50:1755–1763.
- Hong SH, EJ Gang, JA Jeong, et al. (2005). *In vitro* differentiation of human umbilical cord blood-derived mesenchymal stem cells into hepatocyte-like cells. *Biochem Biophys Res Commun* 330:1153–1161.
- Schmelzer E, E Wauthier and LM Reid. (2006). The phenotypes of pluripotent human hepatic progenitors. *Stem Cells* 24:1852–1858.
- Herrera LJ, T El-Hefnawy, PE Queiroz de Oliveira, et al. (2005). The HGF receptor c-Met is overexpressed in esophageal adenocarcinoma. *Neoplasia* 7:75–84.
- Nishimura M, H Yaguti, H Yoshitsugu, et al. (2003). Tissue distribution of mRNA expression of human cytochrome P450 isoforms assessed by high-sensitivity real-time reverse transcription PCR. *Yakugaku Zasshi* 123:369–375.
- Qin J, DM Gao, QF Jiang, et al. (2004). Prospero-related homeobox (Prox1) is a corepressor of human liver receptor homolog-1 and suppresses the transcription of the cholesterol 7-alpha-hydroxylase gene. *Mol Endocrinol* 18:2424–2439.
- Selden C, SA Chalmers, C Jones, et al. (2003). Epithelial colonies cultured from human explanted liver in subacute hepatic failure exhibit hepatocyte, biliary epithelial, and stem cell phenotypic markers. *Stem Cells* 21:624–631.
